# Supplementary material for: Myc-induced glutaminolysis bypasses HIF-driven glycolysis in hypoxic small cell lung carcinoma cells
Source: PubMed Central journal article supplement (PMC5564742; doi:10.18632/oncotarget.16904), 2017-04-06
Supplement: oncotarget-08-48983-s001.pdf [file oncotarget-08-48983-s001.pdf]

# Myc-induced glutaminolysis bypasses HIF-driven glycolysis in hypoxic small cell lung carcinoma cells

## Supplementary Materials

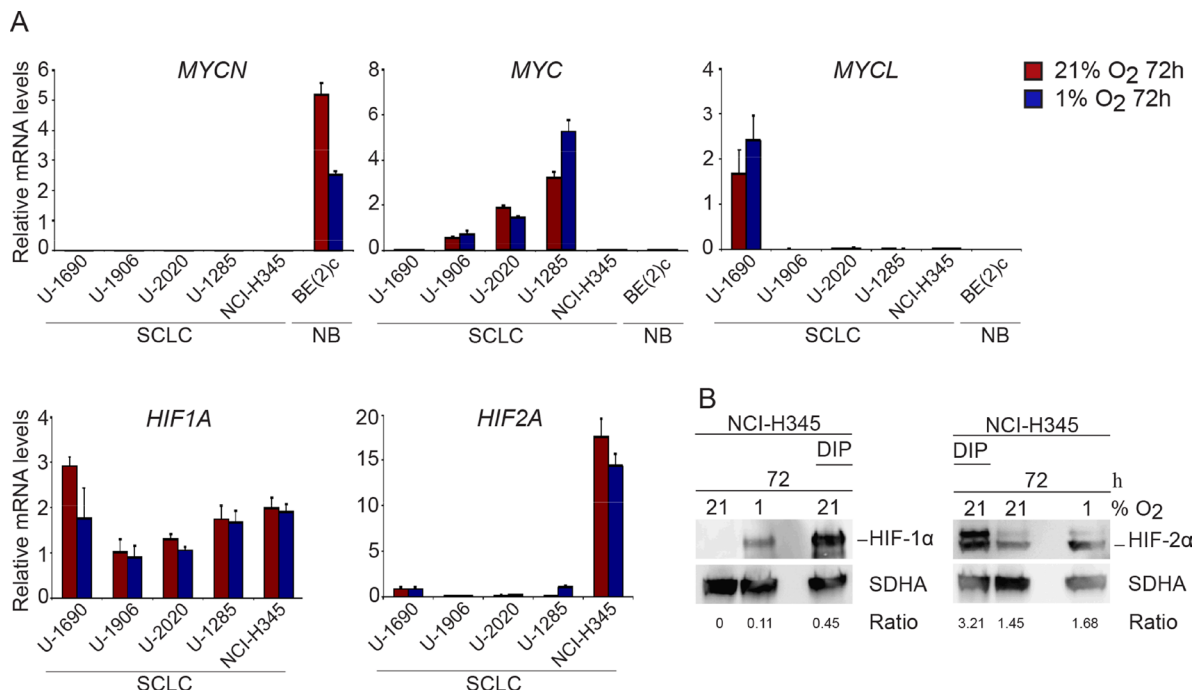

**Supplementary Figure 1: MYCN, MYC, MYCL, HIF1A and HIF2A expression in SCLC cell lines.** (A) The SCLC cell lines U-1690, U-1906, U-2020, U-1285 and NCI-H345 and the neuroblastoma cell line SK-N-BE(2)c were cultured at 21% or 1% oxygen for 72 hours. The mRNA levels were normalized to three reference genes (*HPRT1*, *UBC*, *TBP*) and data is one representative experiment; error bars show the standard deviation within triplicates. (B) HIF-1α and HIF-2α western blot analyses of whole cell lysates. DIP treated cells grown at 21% oxygen for 4 hours were used as a positive control. SDHA was used as loading control and ratio between HIF-1α/SDHA and HIF-2α /SDHA was calculated.

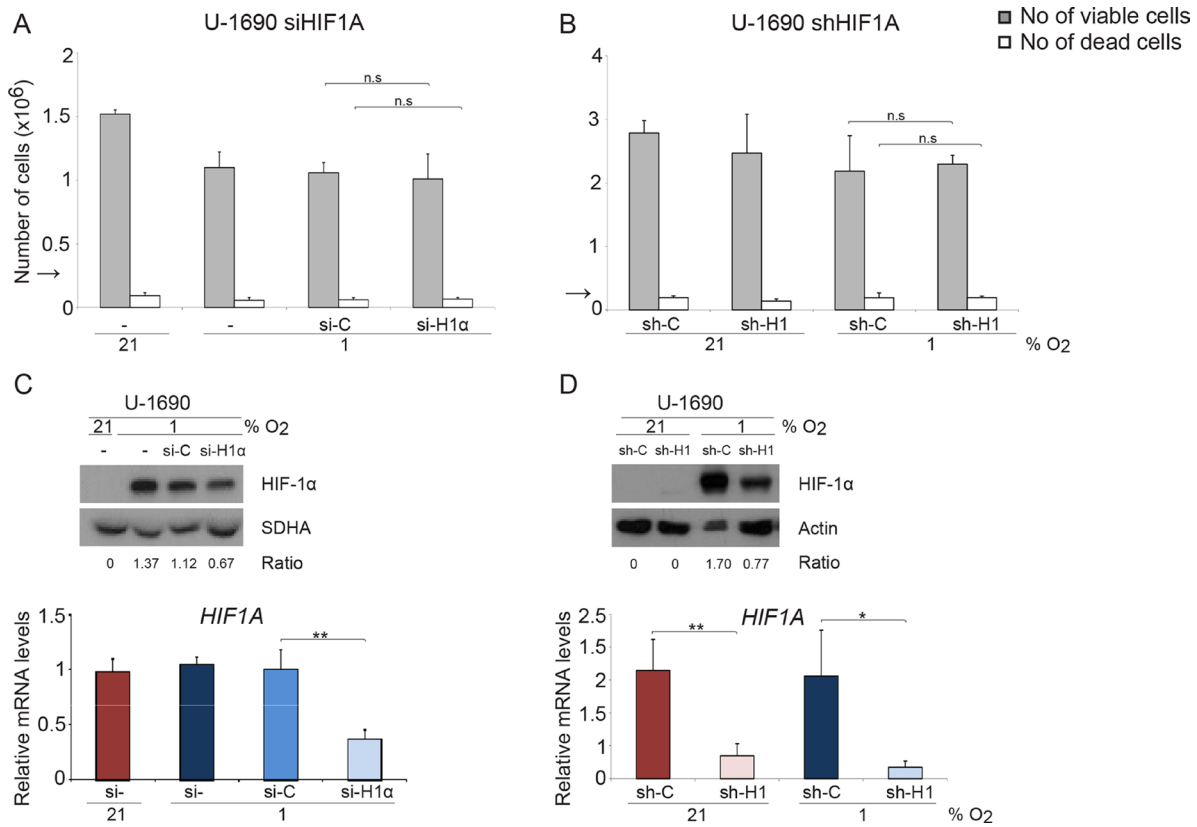

**Supplementary Figure 2: SCLC cells survive well at 1% oxygen despite *HIF1A* repression.** (A) U-1690 cells were transfected with siRNA against *HIF1A* (si-H1 $\alpha$ ) or a non-targeting siRNA (si-C) or treated with lipofectamine alone (-). (B) U-1690 cells were transduced with shRNA against *HIF1A* (sh-H1) or a non-targeting control (sh-C). The cells were cultured at 21% or 1% oxygen for 72 hours. The number of viable and dead cells was counted and the arrow indicates the number of cells seeded at day 0. (C, D) HIF-1 $\alpha$  protein levels were analyzed by immunoblotting and SDHA were used as loading control. Ratio between HIF-1 $\alpha$  and SDHA was calculated. mRNA expression levels of *HIF1A* were analyzed by qPCR and expression data were normalized to three reference genes (*HPRT1*, *UBC*, *TBP*). Error bars show the standard deviation and all statistical analyses were performed using 2-tailed unpaired Student's *t* test, \* indicates  $p < 0.05$ , \*\*  $< 0.01$ , \*\*\*  $< 0.001$ .

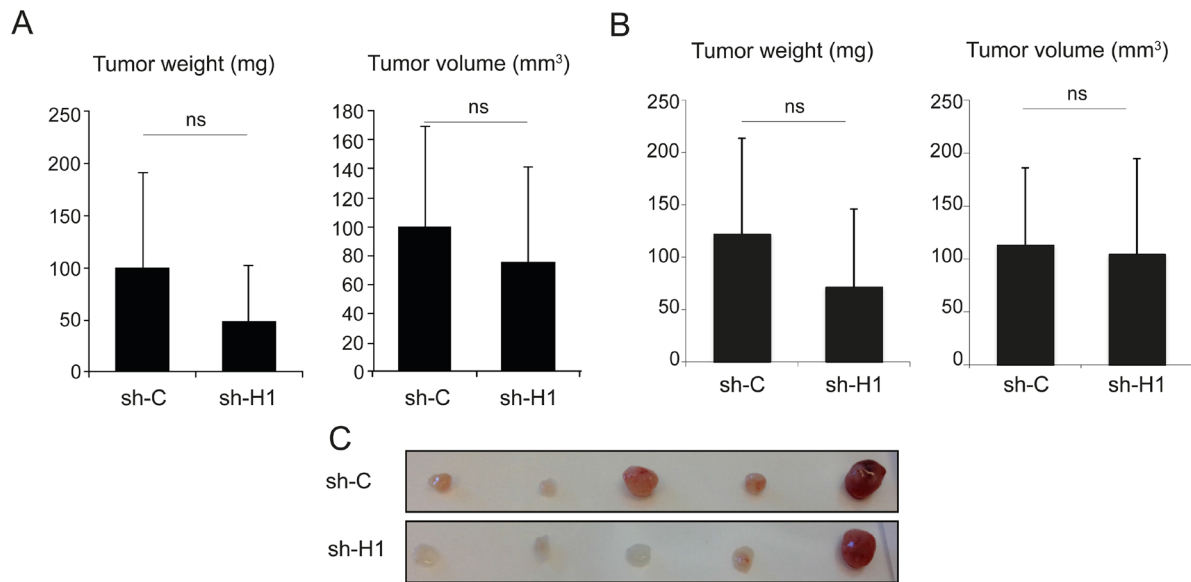

**Supplementary Figure 3: Tumor size and tumor volume is not significantly affected by *HIF1A* repression in SCLC cell xenografts.** The human U-1906 SCLC cells transduced with shRNA against *HIF1A* (sh-H1) or a non-targeting control (sh-C) were xenotransplanted into nude mice. 27 days after injection ( $n = 5$  for each group), mean tumor specimen weight and tumor volume were measured in (A) all palpable tumors and (B) in specimens with confirmed tumor growth. Statistical analyses were performed by using Student's *t*-test and error bars indicate SEM. (C) Representative pictures of xenograft tumors are shown.

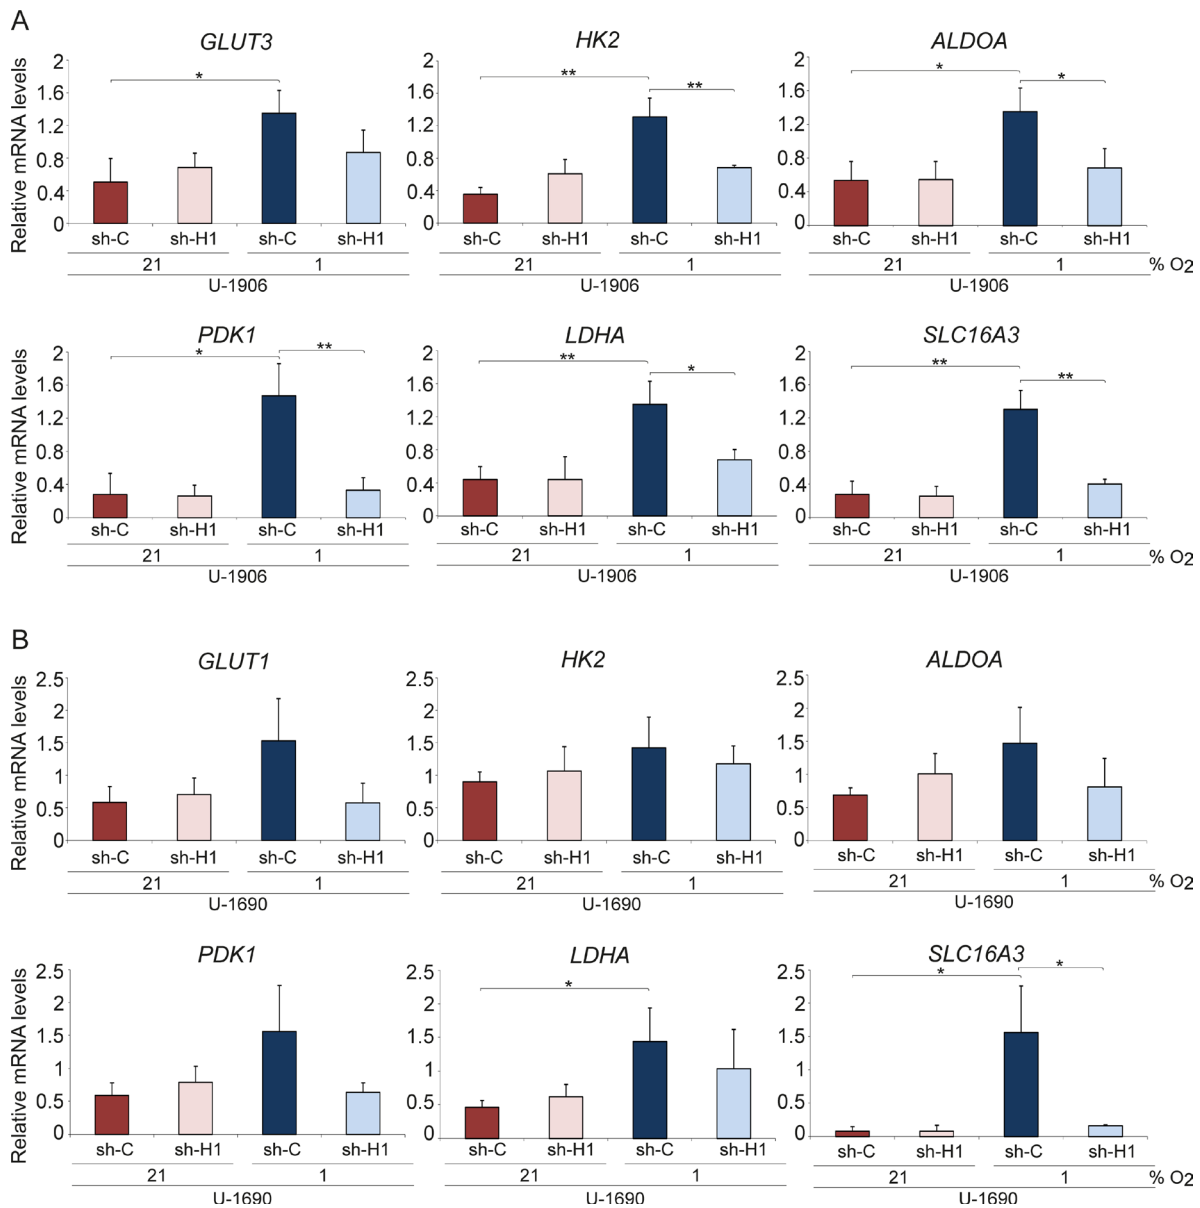

**Supplementary Figure 4: In *HIF1A* repressed SCLC cells the anaerobic glycolysis is diminished.** The SCLC cells, (A) U-1906 and (B) U-1690, transduced with shRNA against *HIF1A* (sh-H1) or a non-targeting control (sh-C) were cultured at 21% or 1% oxygen for 72 hours. The relative mRNA expression levels of indicated glycolytic genes were analyzed by qPCR and all expression data were normalized to three reference genes (*HPRT1*, *UBC*, *TBP*). Data are mean from three experiments; error bars show the standard deviation. All statistical analyses were performed using 2-tailed unpaired Student's *t* test, \* indicates  $p < 0.05$ , \*\*  $< 0.01$ , \*\*\*  $< 0.001$ .

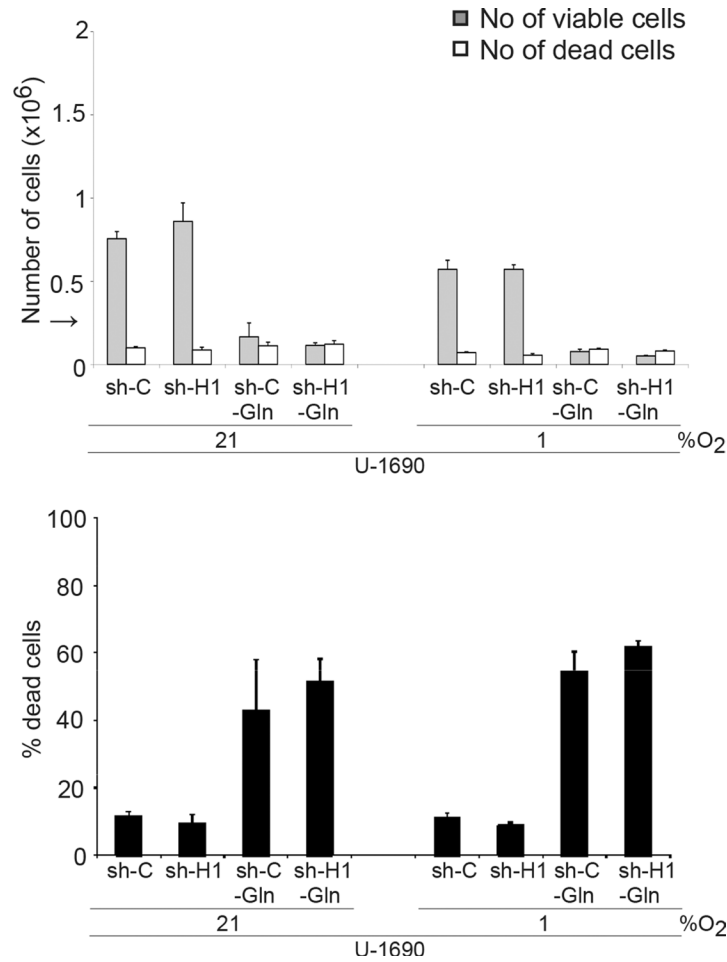

**Supplementary Figure 5: Glutamine withdrawal increases the number of dead cells in *MYCL* amplified SCLC cells.**

The *MYCL* amplified U-1690 SCLC cells transduced with shRNA (sh-H1) against *HIF1A* or a non-targeting control (sh-C), were grown in RPMI medium with (2 mM) or without glutamine (-Gln). The total numbers of viable and dead U-1690 cells were counted after 72 hours culturing at 21% or 1% oxygen. The arrows indicate the number of cells seeded at day 0. The percentage of dead cells compared to total number of cells is also presented. Data is one representative experiment; error bars show the standard deviation within triplicates.

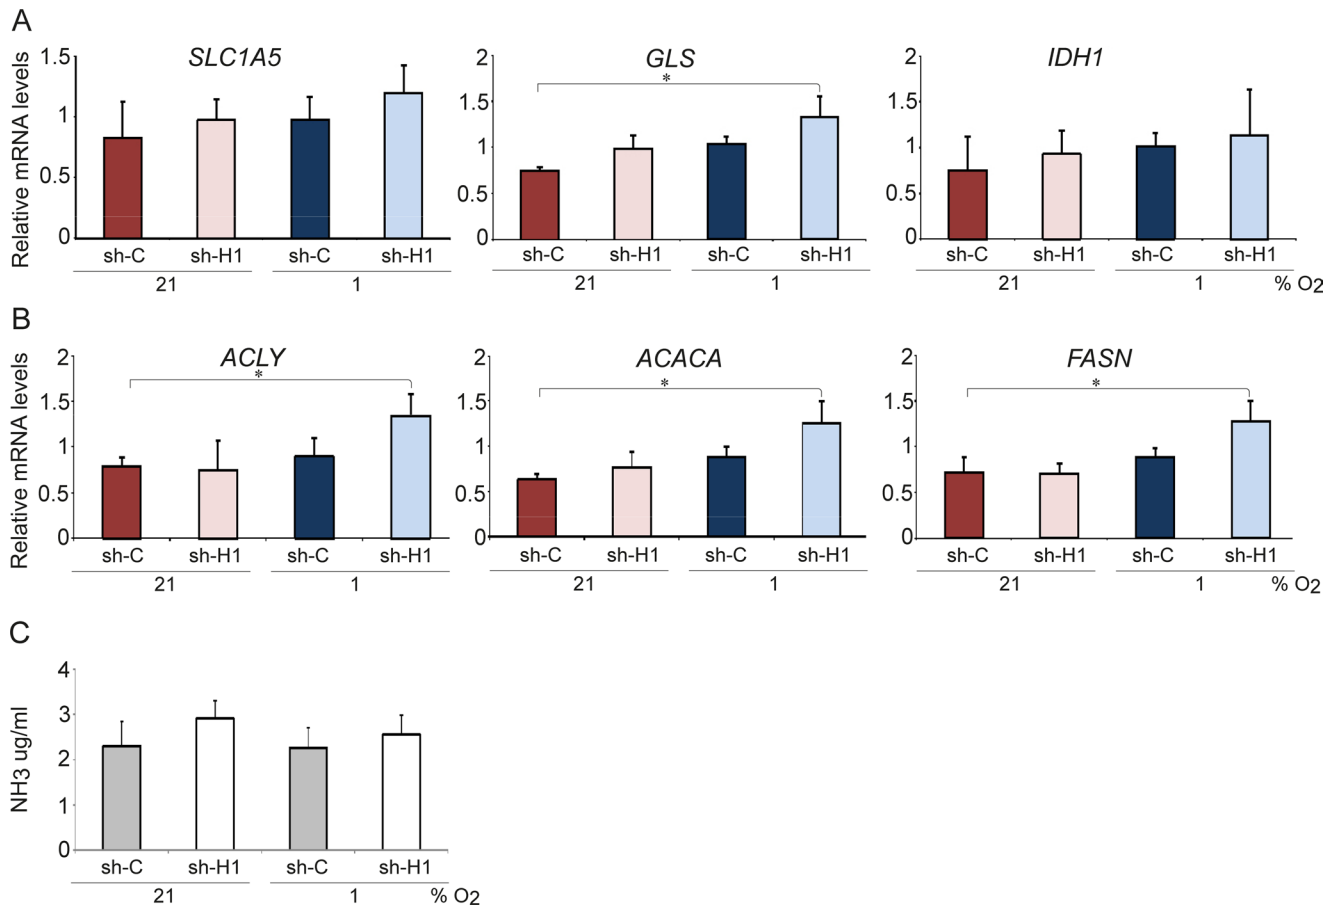

**Supplementary Figure 6: Induced expression of genes involved in glutaminolysis and lipogenesis in *HIF-1A* repressed SCLC cells.** U-1906 cells transduced with shHIF1A (sh-H1) or a non-targeting control (sh-C) were cultured for 72 hours at 21% or 1% oxygen. (A and B) The relative mRNA expression levels of *SLC1A5*, *GLS*, *IDH1*, *ACLY*, *ACACA* and *FASN* were analyzed by qPCR. All expression data were normalized to three reference genes (*HPRT1*, *UBC*, *TBP*). Data are mean from three experiments. Error bars show the standard deviation and 2-tailed unpaired Student's *t* test were performed, \* indicates  $p < 0.05$ . (C) Secreted NH<sub>3</sub> levels in cell culture medium was spectrophotometrically measured. Data are mean of two experiments; error bars show the standard deviation within the two experiments.

**Supplementary Table 1: Nucleotide sequences of primers used for Q-PCR reactions**

| <b>Primers</b> | <b>Primer sequence</b>                                             |
|----------------|--------------------------------------------------------------------|
| <i>ACACA</i>   | f: 5'-cttcttactggcggctga-3'<br>r: 5'-agggttgccattgtggatt-3'        |
| <i>ACLY</i>    | f: 5'-accgaagaccaacatccaca-3'<br>r: 5'-gcaacatcctaacgccctac-3'     |
| <i>ALDOA</i>   | f: 5'-cgagaacaccgaggagaacc-3'<br>r: 5'-tcagcacacaacgccactt-3'      |
| <i>FASN</i>    | f: 5'-ccaaggacacagtcacatct-3'<br>r: 5'-ctgctccacgaactcaaaca-3'     |
| <i>GLS</i>     | f: 5'-gctgtgctccattgaagtgact-3'<br>r: 5'- ttgggcagaaaccaccattag-3' |
| <i>GLUT1</i>   | f: 5'-cttctatccaggagggtggctat-3'<br>r: 5'- aatggagctgaccctagag-3'  |
| <i>GLUT3</i>   | f: 5'-gccgctgctactgggttta-3'<br>r: 5'-gggactttcagggcaaatg-3'       |
| <i>HIF1A</i>   | f: 5'-ttccagttacgttcctcgatca-3'<br>r: 5'-ttgaggactgctgcttca-3'     |
| <i>HIF2A</i>   | f: 5'-gtgctcccacggcctgta-3'<br>r: 5'-ttgtcacacctatggcatacaca-3'    |
| <i>HK2</i>     | f: 5'-gccgggctgagattcttct-3'<br>r: 5'-gcgacgtgtccggtgtc-3'         |
| <i>HPRT1</i>   | f: 5'-tgacactggcaaaacaatgca-3'<br>r: 5'-ggtcctttcaccagcaagct-3'    |
| <i>LDHA</i>    | f: 5'-agccegatccgttacct-3'<br>r: 5'-gcaacattcattccactcca-3'        |
| <i>IDH1</i>    | f: 5'-tcagtggcggttctgtgta-3'<br>r: 5'-cttgggtgactggtcgttgg-3'      |
| <i>MYC</i>     | f: 5'-egtetccacacatcagcaca-3'<br>r: 5'-cactgtccaactgaccctttg-3'    |
| <i>MYCL</i>    | f: 5'-tccacaccgtgagaaatcct-3'<br>r: 5'-ttcatacccattccca-3'         |
| <i>MYCN</i>    | f: 5'-cgcaaaagccactctcatta-3'<br>r: 5'-tccagcagatgccacataagg-3'    |
| <i>PDK1</i>    | f: 5'-ccagcagagaacccaaga<br>r: 5'-tccgatgtccaagtgtgt               |
| <i>SLC1A5</i>  | f: 5'-actgcctttgggacctctc<br>r: 5'-attctctccacgcacttca             |
| <i>SLC16A3</i> | f: 5'-ctctccagcccgtctacc<br>r: 5'-tcctaactccaccacac                |
| <i>TBP</i>     | f: 5'-cacgaaccacggcactgatt-3'<br>r: 5'-ttttctgctgccagtctggac-3'    |
| <i>UBC</i>     | f: 5'-atttgggtcgggttctt-3'<br>r: 5'-tgccttgacattctcgatgt-3'        |
